# Supplementary material
Source: PubMed Central journal article supplement (PMC7334568)
Supplement: pnas.1916665117.sapp.pdf [file pnas.1916665117.sapp.pdf]

# Supporting Information

Sahara, Kodama & Stevens

**SI1. Table 1. The fraction of all the cell types from E10.5 to E18.5 mouse embryonic stages**

| stage (E) | f_neuron (%) | f_NE (%)    | f_bIP (%)   | f_gliaP (%) | f_GABA (%)  | f_RG (%)    |
|-----------|--------------|-------------|-------------|-------------|-------------|-------------|
| 10.5      | 0.845571108  | 90.28406957 | 0.127226463 | 0           | 0           | 7.769108819 |
| 11.5      | 11.80248988  | 60.68040374 | 0.975890699 | 0           | 0           | 32          |
| 12.5      | 23.39400222  | 31.64503913 | 2.361291507 | 0           | 0           | 44.69682432 |
| 13.5      | 34.1993264   | 20.44139306 | 6.862271538 | 0           | 0.978648858 | 40.68457    |
| 14.5      | 42.71070425  | 7.853673648 | 4.653398698 | 0           | 7.217990392 | 32.55542824 |
| 15.5      | 57.41456307  | 5.04806366  | 6.201175178 | 0           | 9.41505857  | 22.67529465 |
| 16.5      | 68.29161543  | 3.247719875 | 7.932708172 | 1.169447197 | 11.58025907 | 12.87298949 |
| 17.5      | 68.21109828  | 1.519037493 | 4.448543791 | 2.124757068 | 13.65369756 | 9.672291539 |
| 18.5      | 69.88534977  | 0.357770876 | 3.380929081 | 5.024485716 | 17.03225748 | 6.597338797 |

| sem_neuron  | sem_NE      | sem_bIP     | sem_gliaP   | sem_GABA    | sem_RG      |
|-------------|-------------|-------------|-------------|-------------|-------------|
| 0.197615708 | 1.652851304 | 0.127226463 | 0           | 0           | 2.126814588 |
| 2.010652241 | 3.201937518 | 0.124361452 | 0           | 0           | 5.542280026 |
| 0.447644187 | 3.876815793 | 0.621867876 | 0           | 0           | 2.056630212 |
| 3.892021873 | 3.361393601 | 1.137055772 | 0           | 0           | 3.23289547  |
| 5.264768257 | 1.728452574 | 0.808030687 | 0           | 0           | 0.893415138 |
| 5.184228918 | 0.24893758  | 1.023955256 | 0           | 0           | 2.174084039 |
| 1.901258292 | 0.523752827 | 1.106654324 | 0.434565785 | 0.434565785 | 2.228536169 |
| 2.263722124 | 0.430639833 | 2.280864764 | 0.354942669 | 0.354942669 | 3.834065794 |
| 3.409491769 | 0.16        | 1.435636474 | 0.439707402 | 0.439707402 | 2.090878471 |

**SI2. Table 2. The fraction of cell death from E10.5 to E14,5 mouse embryonic stages**

| Embryonic stages (E) | Cell death (%) |
|----------------------|----------------|
| 10.5                 | 0.798190768    |
| 11.5                 | 0.465611281    |
| 12.5                 | 0.665158973    |
| 13.5                 | 1.463349741    |
| 14.5                 | 0.199547692    |

**SI3. Table 3. Cell cycle length data of published and this study**

| Embryonic stages (E) | Takahashi et al (1996)  | This study              |                                        |                                                       |                                         |                                   |
|----------------------|-------------------------|-------------------------|----------------------------------------|-------------------------------------------------------|-----------------------------------------|-----------------------------------|
|                      | the VZ on sections (hr) | the VZ on sections (hr) | dissociated total cells (Nestin+) (hr) | Dissociated NE cells (Blbp-Glast-Tbr2-, Nestin+) (hr) | Dissociated RG cells (Blbp+Glast+) (hr) | Dissociated RG cells (Tbr2+) (hr) |
| 10.5                 | NA                      | 11.1                    | 11                                     | 11                                                    | NA                                      | NA                                |
| 11.5                 | NA                      | 12.4                    | 11.7                                   | 11.3                                                  | 11.8                                    | NA                                |
| 12.5                 | 10.2                    | 11.8                    | 12.2                                   | 11.7                                                  | 11.4                                    | 13.6                              |
| 13.5                 | 11.4                    | 15.5                    | 13.4                                   | 11.3                                                  | 13.1                                    | 13.2                              |
| 14.5                 | 15.1                    | 18.4                    | 18.9                                   | 9.2                                                   | 19.6                                    | 25.3                              |
| 15.5                 | 17.5                    | 20.6                    | 19.5                                   | 12.3                                                  | 19                                      | 34.9                              |
| 16.5                 | 18.4                    | NA                      | NA                                     | NA                                                    | NA                                      | NA                                |

**SI4. Figure S1 Comparison of fitting methods for the estimation of each progenitor type**

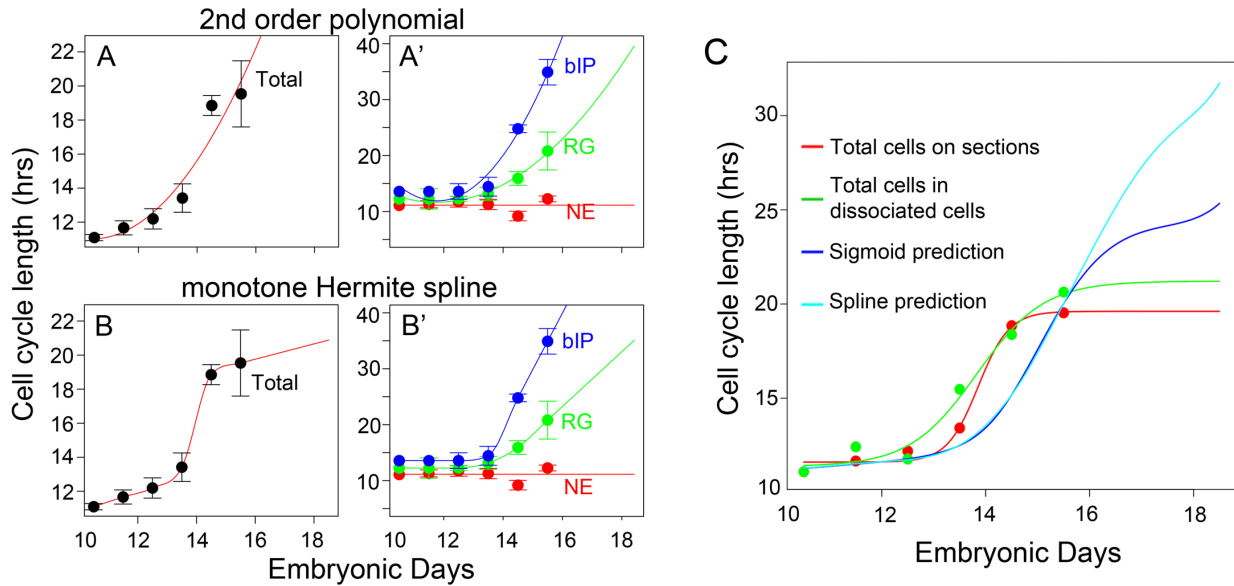

(A-B') Alternative models of the cell cycle data. 2<sup>nd</sup> order polynomial fitting curves (A, A') or a monotone Hermite spline interpolation to the same data corresponding to the Figure 2K-M. The cell cycle length of NE is fitted by a constant. (C) Predicted average cell cycle length of total progenitor population calculated from the estimated cell cycle lengths of NE, RG, bIPs, and glial progenitors. Cell cycle length of RGs and bIPs are modeled by sigmoid function (blue) or spline interpolation (light blue). The cell cycle length of glial progenitors is set to a constant based on published data (22.5 hours; Knapp et al., 1992, shorter than 24 hours; Burns et al., 2009) (1, 2). Experimentally measured average cell cycle length of total progenitor population using total cells on section (red) and that of total dissociated cells (green) are shown for comparison. Prediction with the sigmoid function models is closer to experimentally measured results.

### SI5. Modelling of NE and RG behaviors with cell type-specific cell cycle length for Figure 3

NEs, RGs, and bIPs have distinct cell-cycle lengths (Figure 2). To incorporate the different cell cycle lengths in estimation of expansion coefficients ( $\alpha_s, \alpha_r$ ), the model described in the main text is evolved as follows. We exclusively consider cells derived from NEs, and the developmental stages in which the fraction of RG-derived glial progenitor is negligible (from E10.5 to E17.5). That is,

$$s(t) + r(t) + p(t) + v(t) = 1 \quad (1)$$

where  $s(t)$ ,  $r(t)$ ,  $p(t)$ , and  $v(t)$  are the fractions of NEs, RGs, bIPs, and excitatory neurons at time  $t$  ( $E10.5 \leq t \leq E17.5$ ).

In a short period of time ( $\Delta t$ ), in which cell cycle lengths of the progenitors ( $T_x(t)$ , with  $x = s, r, p$ ) can be regarded as constants, the fraction of the progenitors that undergo cell division is  $\Delta t/T_x(t)$  (assuming equal cell density throughout the cell cycle). When  $N(t)$  is the total number of cells at time  $t$ ,  $N(t+\Delta t)$  is;

$$N(t + \Delta t) = \overbrace{\left(1 - \frac{\Delta t}{T_s(t)}\right)s(t)N(t) + 2\frac{\Delta t}{T_s(t)}s(t)N(t)}^{\text{cells from NEs}} + \overbrace{\left(1 - \frac{\Delta t}{T_r(t)}\right)r(t)N(t) + 2\frac{\Delta t}{T_r(t)}r(t)N(t)}^{\text{cells from RGs}} \\ + \overbrace{\left(1 - \frac{\Delta t}{T_p(t)}\right)p(t)N(t) + 2\frac{\Delta t}{T_p(t)}p(t)N(t)}^{\text{cells from bIPs}} + \overbrace{v(t)N(t)}^{\text{neuron}}$$

Applying (1) to the equation above yields;

$$N(t + \Delta t) = \left(1 + \frac{\Delta t}{T(t)}\right)N(t) \quad (2)$$

where

$$\frac{1}{T(t)} = \frac{s(t)}{T_s(t)} + \frac{r(t)}{T_r(t)} + \frac{p(t)}{T_p(t)}$$

#### A. Evolution of expansion coefficient of NE ( $\alpha_s$ )

Let  $n_s(t)$  be the number of NEs at time  $t$ .

$$n_s(t + \Delta t) = \overbrace{\left(1 - \frac{\Delta t}{T_s(t)}\right)n_s(t)}^{\text{no division}} + \overbrace{\alpha_s \frac{\Delta t}{T_s(t)}n_s(t)}^{\text{NE} \rightarrow \text{NE}} = \left\{1 + (\alpha_s - 1)\frac{\Delta t}{T_s(t)}\right\}n_s(t) \quad (3)$$

Dividing this equation (3) by (2) results

$$s(t + \Delta t) = \frac{1 + (\alpha_s - 1)\varphi_s(t)}{1 + \varphi(t)} \cdot s(t) \quad (4)$$

where  $\varphi(t) = \Delta t/T(t)$ ,  $\varphi_x(t) = \Delta t/T_x(t)$  (with  $x = s, r, p$ ).

In (4), all the variables but  $\alpha_s$  are known. Solving (4) for  $\alpha_s$  yields;

$$\alpha_s = \frac{s(t + \Delta t)(1 + \varphi(t)) - s(t)}{s(t)\varphi_s(t)} + 1 \quad (5)$$

## B. Evolution of expansion coefficient of RG ( $\alpha_r$ ) from NE and RG fractions

Let  $n_r(t)$  be the number of RGs at time  $t$ .

$$n_r(t + \Delta t) = \overbrace{\left(1 - \frac{\Delta t}{T_r(t)}\right) n_r(t)}^{\text{no division}} + \overbrace{\alpha_r \frac{\Delta t}{T_r(t)} n_r(t)}^{\text{RG} \rightarrow \text{RG}} + \overbrace{\beta_s \frac{\Delta t}{T_s(t)} n_s(t)}^{\text{NE} \rightarrow \text{RG}} \quad (6)$$

With  $\alpha_s + \beta_s = 2$ , summing (6) and (3) yields;

$$n_s(t + \Delta t) + n_r(t + \Delta t) = (1 + \varphi_s(t))n_s(t) + \{1 + (\alpha_r - 1)\varphi_r(t)\}n_r(t)$$

Dividing the above equation by (2) results;

$$s(t + \Delta t) + r(t + \Delta t) = \frac{(1 + \varphi_s(t))s(t) + \{1 + (\alpha_r - 1)\varphi_r(t)\}r(t)}{1 + \varphi(t)}$$

Solving the above equation for  $\alpha_r$  yields;

$$\alpha_r = \frac{(s(t + \Delta t) + r(t + \Delta t))(1 + \varphi(t)) - (1 + \varphi_s(t))s(t) - r(t)}{r(t)\varphi_r(t)} + 1 \quad (7)$$

## C. Evolution of expansion coefficient of RG ( $\alpha_r$ ) from RG, bIP, and neuron fractions

Let  $n_p(t)$  be the number of bIPs at time  $t$ .

$$n_p(t + \Delta t) = \overbrace{\left(1 - \frac{\Delta t}{T_p(t)}\right) n_p(t)}^{\text{no division}} + \overbrace{\alpha_p \frac{\Delta t}{T_p(t)} n_p(t)}^{\text{bIP} \rightarrow \text{bIP}} + \overbrace{2\Phi_2(1 - \mu_2) \frac{\Delta t}{T_r(t)} n_r(t)}^{\text{RG} \rightarrow 2\text{bIP}} + \overbrace{\Phi_1(1 - \mu_1) \frac{\Delta t}{T_r(t)} n_r(t)}^{\text{RG} \rightarrow 1\text{bIP}} \quad (8)$$

where  $\Phi_1$  and  $\Phi_2$  denote probabilities that that RGs generate one neuron or two neurons, respectively.

Let  $n_n(t)$  be the number of neurons at time  $t$ .

$$n_n(t + \Delta t) = \overbrace{n_n(t)}^{\text{neuron}} + \overbrace{\beta_p \frac{\Delta t}{T_p(t)} n_p(t)}^{\text{bIP} \rightarrow \text{neuron}} + \overbrace{2\Phi_2\mu_2 \frac{\Delta t}{T_r(t)} n_r(t)}^{\text{RG} \rightarrow 2\text{neuron}} + \overbrace{\Phi_1\mu_1 \frac{\Delta t}{T_r(t)} n_r(t)}^{\text{RG} \rightarrow 1\text{neuron}} \quad (9)$$

With  $\alpha_p + \beta_p = 2$  and  $\beta_r = 2\Phi_2 + \Phi_1$ , summing (8) and (9) yields;

$$n_p(t + \Delta t) + n_n(t + \Delta t) = n_n(t) + (1 + \varphi_p(t))n_p(t) + \beta_r \varphi_r(t)n_r(t)$$

Dividing the above equation by (2) results;

$$p(t + \Delta t) + n(t + \Delta t) = \frac{n(t) + (1 + \varphi_p(t))p(t) + \beta_r \varphi_r(t)r(t)}{1 + \varphi(t)}$$

Solving the above equation for  $\beta_r$  yields;

$$\beta_r = \frac{(p(t+\Delta t)+n(t+\Delta t))(1+\varphi(t)) - (1+\varphi_p(t))p(t) - n(t)}{r(t)\varphi_r} \quad (10)$$

$\alpha_r$  is obtained by;

$$\alpha_r = 2 - \beta_r \quad (11)$$

## References

1. P. E. Knapp, The cell cycle of glial cells grown in vitro: an immunocytochemical method of analysis. *J Histochem Cytochem.* **40**, 1405–1411 (1992).
2. K. A. Burns, B. Murphy, S. C. Danzer, C.-Y. Kuan, Developmental and post-injury cortical gliogenesis: A Genetic fate-mapping study with Nestin-CreER mice. *Glia* **57**, 1115–1129 (2009).
